# Supplementary material for: The Effects of Six-Weeks Change of Direction Speed and Technique Modification Training on Cutting Performance and Movement Quality in Male Youth Soccer Players
Source: PubMed Central journal article supplement (PMC6783855; doi:10.3390/sports7090205), 2019-09-06
Supplement: sports-07-00205-s001.pdf [file sports-07-00205-s001.pdf]

Supplement information

# The Effects of Six-Weeks Change of Direction Speed and Technique Modification Training on Cutting Performance and Movement Quality in Male Youth Soccer Players

Thomas Dos'Santos \*, Alistair McBurnie, Paul Comfort and Paul A. Jones

Directorate of Sport, Exercise & Physiotherapy, University of Salford, Salford, Greater Manchester M6 6PU, UK; a.McBurnie@edu.salford.ac.uk (A.M.); p.comfort@salford.ac.uk (P.C.); P.A.Jones@salford.ac.uk (P.A.J.)

\* Correspondence: t.dossantos@edu.salford.ac.uk; Tel.: +44-161-295-2371

**Table S1.** 6-week COD speed and technique modification training programme.

| Week   | COD Emphasis                                                                                                                   | Drills                                                                                                                                                                                                                                                                                  | Session 1                                                                                                                                                                                                                                          |                    |                                  | Session 2                                                                                                                                                                                                                                                                               |                                                                                                                                                                                                                                                                                                                                                                                                                 |                    |                                  |
|--------|--------------------------------------------------------------------------------------------------------------------------------|-----------------------------------------------------------------------------------------------------------------------------------------------------------------------------------------------------------------------------------------------------------------------------------------|----------------------------------------------------------------------------------------------------------------------------------------------------------------------------------------------------------------------------------------------------|--------------------|----------------------------------|-----------------------------------------------------------------------------------------------------------------------------------------------------------------------------------------------------------------------------------------------------------------------------------------|-----------------------------------------------------------------------------------------------------------------------------------------------------------------------------------------------------------------------------------------------------------------------------------------------------------------------------------------------------------------------------------------------------------------|--------------------|----------------------------------|
|        |                                                                                                                                |                                                                                                                                                                                                                                                                                         | Intensity (perceived speed)                                                                                                                                                                                                                        | Total Distance (m) | Number of Decelerations and CODs | Drills                                                                                                                                                                                                                                                                                  | Intensity (perceived speed)                                                                                                                                                                                                                                                                                                                                                                                     | Total Distance (m) | Number of Decelerations and CODs |
| Week 1 | <ul style="list-style-type: none"> <li>Drills specific to deceleration phase, before adding turn and reacceleration</li> </ul> | <ol style="list-style-type: none"> <li>10 × 5-m acceleration to deceleration (2 reps a go)</li> <li>12 × 5-m acceleration to side-steps (20-60°) – 5-m exit to deceleration – 2 reps at 20°, 40°, 60°</li> <li>8 × 5-m acceleration to 135° turns – 5-m exit to deceleration</li> </ol> | 50-75%                                                                                                                                                                                                                                             | 250                | 25 and 20                        | <ol style="list-style-type: none"> <li>10 × 5 m acceleration to deceleration (2 reps a go)</li> <li>12 × 5 m acceleration to side-steps (20-60°) – 5-m exit to deceleration – 2 reps at 20°, 40°, 60°</li> <li>8 × 5-m acceleration to 135° turns – 5-m exit to deceleration</li> </ol> | 50-75%                                                                                                                                                                                                                                                                                                                                                                                                          | 250                | 25 and 20                        |
|        |                                                                                                                                | <ul style="list-style-type: none"> <li>Submaximal/ pre-planned emphasising key aspects of technique</li> <li>Progressive increase in COD angle and approach velocity</li> </ul>                                                                                                         | <ol style="list-style-type: none"> <li>8 × 5-m acceleration to deceleration</li> <li>14 × 5-m acceleration to side steps (45-90°) – 5-m exit to deceleration</li> <li>8 × 5-m acceleration to 135-180° turns – 5-m exit to deceleration</li> </ol> | 75%+               | 230                              | 30 and 22                                                                                                                                                                                                                                                                               | <ol style="list-style-type: none"> <li>4 × 5-m acceleration to deceleration</li> <li>4 × 10-m acceleration to deceleration</li> <li>3 × 80° zig-zag runs – (2 cuts a rep)- 5-m between cuts to 5-m deceleration (60% effort)</li> <li>4 × 80° zig-zag runs – (2 cuts a rep) – 5-m between cuts to 5-m deceleration</li> <li>2 × 80° zig-zag runs with 180° turn– 4 cuts per trial – 5-m between cuts</li> </ol> | 100%               | 285                              |

|               |                                                                                                                                                                     |                                                                                                                                                                                                                                                                                                                                                                                                                                                       |                                                                                                                              |     |           |  |  |  |  |  |  |  |  |                                                                                                                                                                                                                                                                                                                                                                                                                                                                                                                        |
|---------------|---------------------------------------------------------------------------------------------------------------------------------------------------------------------|-------------------------------------------------------------------------------------------------------------------------------------------------------------------------------------------------------------------------------------------------------------------------------------------------------------------------------------------------------------------------------------------------------------------------------------------------------|------------------------------------------------------------------------------------------------------------------------------|-----|-----------|--|--|--|--|--|--|--|--|------------------------------------------------------------------------------------------------------------------------------------------------------------------------------------------------------------------------------------------------------------------------------------------------------------------------------------------------------------------------------------------------------------------------------------------------------------------------------------------------------------------------|
|               |                                                                                                                                                                     |                                                                                                                                                                                                                                                                                                                                                                                                                                                       |                                                                                                                              |     |           |  |  |  |  |  |  |  |  | 6. 3 × 5-m approach to 180°, 5-m approach to 180°, to 10-m deceleration                                                                                                                                                                                                                                                                                                                                                                                                                                                |
| <b>Week 3</b> | <ul style="list-style-type: none"> <li>Pre-planned drill performed maximally</li> <li>Introduction of unanticipated generic stimuli (auditory or visual)</li> </ul> | <ol style="list-style-type: none"> <li>2 × 5 reps per limb: Jump-landings – lateral reactive jumps</li> <li>4 × 10-m acceleration to deceleration</li> <li>5 × 45° zig-zag runs (2 cuts a rep) -5-m between cuts</li> <li>10 × reactive y-agility (45° cut) – 5-m entry and exit*</li> </ol>                                                                                                                                                          | 100%                                                                                                                         | 215 | 14 and 20 |  |  |  |  |  |  |  |  | <ol style="list-style-type: none"> <li>2 × 5-m acceleration to deceleration-</li> <li>4 × 2.5-10 m unanticipated decelerations – auditory stimuli</li> <li>2 × 15-m zig-zag runs (2 90° cuts) – 5-m between cuts to 5-m deceleration</li> <li>2 × 15-m zig-zag runs relay (2 90° cuts) – 5-m between cuts to 5-m deceleration</li> <li>8 × reactive y-agility (60° cut) – 7.5-m entry and exit*</li> <li>3 × 5-m approach to 180°, 5-m approach to 180°, to 10-m deceleration</li> </ol>                               |
| <b>Week 4</b> | <ul style="list-style-type: none"> <li>Unanticipated performed submaximally</li> </ul>                                                                              | <ol style="list-style-type: none"> <li>2 × 5 reps per limb: Jump-landings – lateral reactive jumps</li> <li>4 × 20-m acceleration to deceleration</li> <li>4 × 45° zig-zag runs (2 cuts a rep) -6-m between cuts</li> <li>4 × 15-m tunnel drill – side-stepping past 2 opponents every 7.5-m</li> <li>4 × unanticipated 45° cuts (auditory stimuli) – 7.5-m entry and exit</li> <li>6 × reactive y-agility (45° cut) – 5-m entry and exit*</li> </ol> | <ol style="list-style-type: none"> <li>100%</li> <li>75%+</li> <li>100%</li> <li>75%+</li> <li>75%+</li> <li>100%</li> </ol> | 282 | 4 and 32  |  |  |  |  |  |  |  |  | <ol style="list-style-type: none"> <li>4 × 5-15 m unanticipated decelerations – partner stimuli*</li> <li>2 × 15-m zig-zag runs (2 90° cuts) – 5-m between cuts to 5-m deceleration</li> <li>2 × 30-m zig-zag runs relay (4 90° cuts) – 5-m between cuts to 5-m deceleration</li> <li>4 × unanticipated 45° cuts (auditory stimuli) – 5-m entry and exit</li> <li>6 × reactive y-agility (60° cut) 2 cuts – 5-m entry and exit*</li> <li>4 × 15-m tunnel drill – side-stepping past 2 opponents every 7.5-m</li> </ol> |
| <b>Week 5</b> | <ul style="list-style-type: none"> <li>Unanticipated drills performed maximally</li> <li>Introduction of sport specific stimuli – opponent or ball</li> </ul>       | <ol style="list-style-type: none"> <li>2 × 15-m curvilinear sprint (s shape)</li> <li>12 × 5-m acceleration to side-step (60°) – 5-m exit to deceleration</li> <li>4 × 15-m tunnel drill – side-stepping past 2 opponents every 7.5-m</li> <li>4 × unanticipated 45° cuts (auditory stimuli) – 7.5-m entry and exit</li> </ol>                                                                                                                        | 100%                                                                                                                         | 285 | 10 and 32 |  |  |  |  |  |  |  |  | <ol style="list-style-type: none"> <li>4 × 10-15-m unanticipated decelerations – partner stimuli*</li> <li>2 × 180° races – two turns at any point across 15-m distance – partner lead*</li> <li>8 × X-agility: 1 pivot and 1 cut per rep – up to 15m*</li> <li>3 × 35-m zig-zag runs races (5 × 90° cuts) – 5-m between cuts to 5-m deceleration – 1<sup>st</sup> cut unanticipated</li> </ol>                                                                                                                        |

|                                                                                                     |    |                                                                                           |      |     |          |    |                                                                                                                       |      |           |
|-----------------------------------------------------------------------------------------------------|----|-------------------------------------------------------------------------------------------|------|-----|----------|----|-----------------------------------------------------------------------------------------------------------------------|------|-----------|
|                                                                                                     | 5. | 6 × reactive y-agility (60° cut) 2 cuts – 7.5m entry and exit*                            |      |     |          |    |                                                                                                                       |      |           |
| Week 6                                                                                              | 1. | 12 × 5-m acceleration to side-step (60°) – 5-m exit to deceleration                       |      |     |          | 1. | 4 × 10-15-m unanticipated decelerations – partner stimuli*                                                            |      |           |
|                                                                                                     | 2. | 3 × Zig-zag races – 25-m length 4 × 45° cuts per race – 1 <sup>st</sup> cut unanticipated | 100% | 345 | 48 (COD) | 2. | 2 × 180° races – two turns at any point across 15-m distance – partner lead*                                          |      |           |
|                                                                                                     | 3. | 4 × unanticipated 45° cuts (auditory stimuli) – 7.5-m entry and exit                      |      |     |          | 3. | 8 × X-agility: 1 pivot and 1 cut per rep – up to 15m*                                                                 | 100% | ~405-425  |
|                                                                                                     | 4. | 10 × reactive y-agility (60° cut) cuts – 7.5m entry and exit*                             |      |     |          | 4. | 3 × 35-m zig-zag runs races (5 × 90° cuts) – 5-m between cuts to 5-m deceleration – 1 <sup>st</sup> cut unanticipated |      | 15 and 35 |
| Additional information:                                                                             |    |                                                                                           |      |     |          |    |                                                                                                                       |      |           |
| 1. 30-60 seconds' rest provided between 100% effort reps. 2 minutes' rest provide between exercises |    |                                                                                           |      |     |          |    |                                                                                                                       |      |           |
| 2. All CODs and decelerations to be performed with the aim of modified braking and COD strategy     |    |                                                                                           |      |     |          |    |                                                                                                                       |      |           |
| 3. Feedback to be provided to each player after each rep regarding braking strategy/ COD technique  |    |                                                                                           |      |     |          |    |                                                                                                                       |      |           |

Key: \* = Alternate between leading and reacting / attacking and defending; COD = Change of direction; PFC = Penultimate foot contact; Dec: Deceleration.

**Table S2.** Task-specific pre-post changes in CMAS deficits.

| CMAS criteria                 | IG – Pre-to-post changes in CMAS criteria |        |               |        | CG – Pre-to-post changes in CMAS criteria |       |               |     |
|-------------------------------|-------------------------------------------|--------|---------------|--------|-------------------------------------------|-------|---------------|-----|
|                               | Right cut                                 |        | Left cut      |        | Right cut                                 |       | Left cut      |     |
|                               | n of deficits                             | %      | n of deficits | %      | n of deficits                             | %     | n of deficits | %   |
| No clear PFC braking strategy | -5                                        | -23.8  | -12           | -57.1  | -8                                        | -33.3 | -2            | -8  |
| Wide foot plant               | 3                                         | 33.3   | -2            | -22.2  | 1                                         | 7.7   | 2             | 22  |
| Hip internal rotation         | -7                                        | -100.0 | -5            | -100.0 | -1                                        | -25.0 | -1            | -33 |
| Initial knee valgus           | -9                                        | -39.1  | -5            | -27.8  | -2                                        | -9.1  | -2            | -11 |
| Internal/external foot        | 3                                         | 27.3   | -5            | -26.3  | 1                                         | 5.6   | 9             | 60  |
| Upright trunk                 | 2                                         | 22.2   | 3             | 50.0   | -5                                        | -41.7 | 1             | 9   |
| Lateral trunk flexion         | -4                                        | -26.7  | -5            | -27.8  | 8                                         | 66.7  | -1            | -5  |
| Trunk leaning back            | -4                                        | -57.1  | -5            | -62.5  | 4                                         | 133.3 | 5             | 250 |
| Limited Knee Flexion          | -1                                        | -16.7  | -5            | -50.0  | -2                                        | -12.5 | 6             | 50  |
| Excessive Knee valgus         | -12                                       | -66.7  | -5            | -50.0  | -3                                        | -18.8 | -3            | -43 |

Key: CMAS: Cutting movement assessment score; PFC: Penultimate foot contact; IG Intervention group; CG: Control group; n: number.

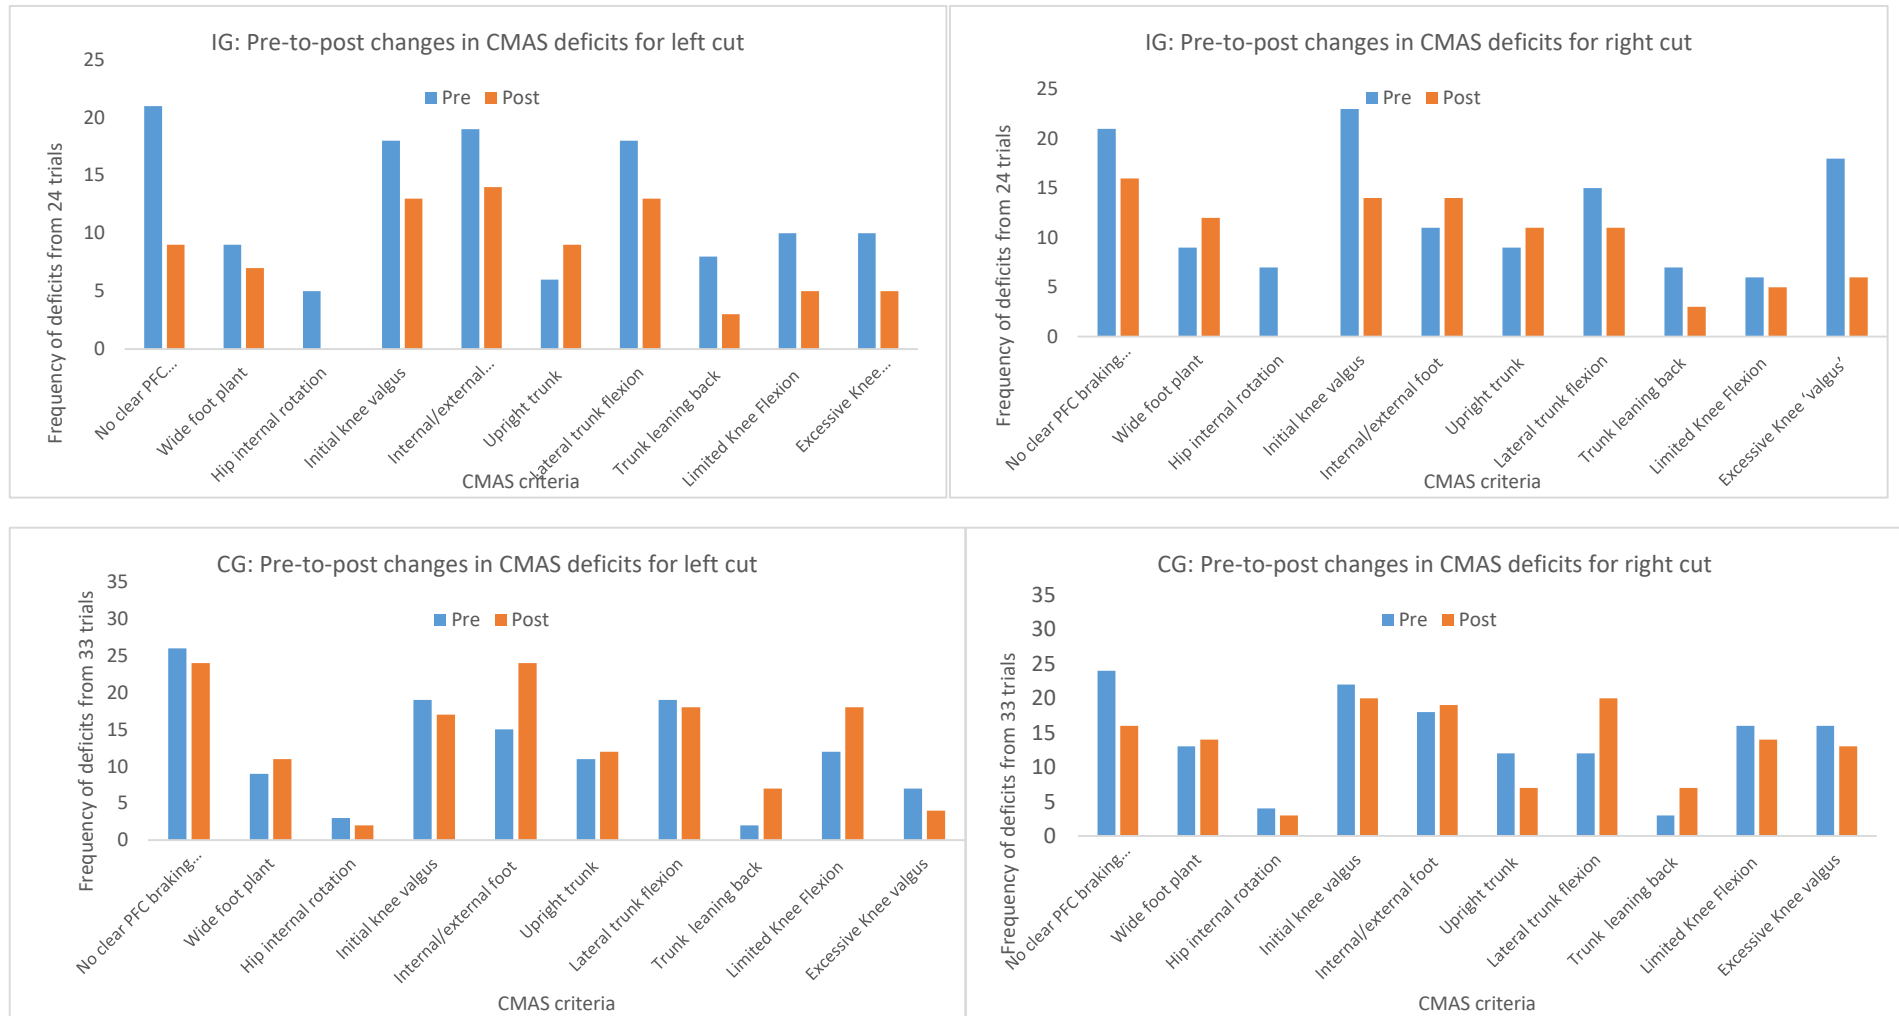

**Figure S1.** Cutting task-specific changes in CMAS deficits. IG: Intervention group; CG: Control group; CMAS: Cutting movement assessment score.

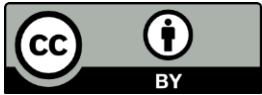

© 2019 by the authors. Submitted for possible open access publication under the terms and conditions of the Creative Commons Attribution (CC BY) license (<http://creativecommons.org/licenses/by/4.0/>).
